# Supplementary material for: Redox-Active Drug, MnTE-2-PyP5+, Prevents and Treats Cardiac Arrhythmias Preserving Heart Contractile Function
Source: Hindawi journal article supplement (doi:10.1155/2020/4850697), 2020-03-21
Supplement: f1 [file 4850697.f1.pdf]

## Supplementary Figure 1

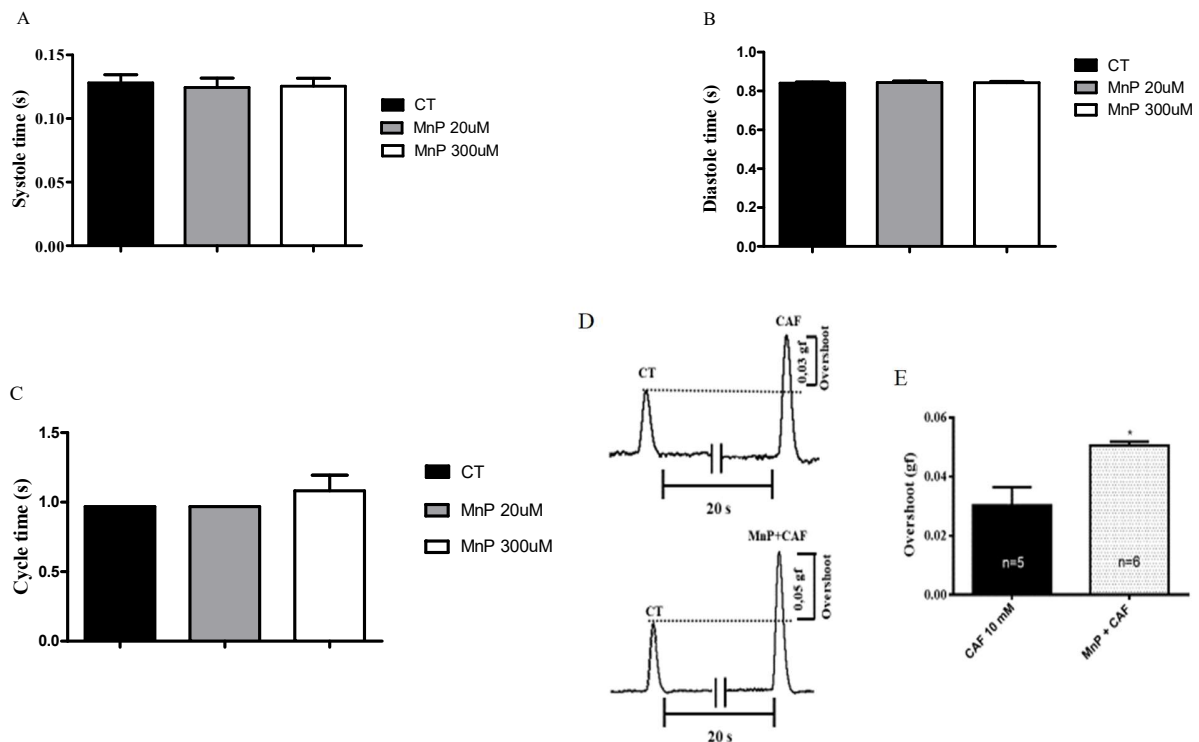

**Figure S1:** MnTE-2-PyP<sup>5+</sup> preserves cardiac cycle phases time and increases SR load in rat hearts. A-C: Concentration effect of MnTE-2-PyP<sup>5+</sup> on cardiac cycle phases time; A: Systolic time is not altered by MnTE-2-PyP<sup>5+</sup>; B: Diastolic time is not altered by MnTE-2-PyP<sup>5+</sup>; C: Cardiac cycle time is not altered by MnTE-2-PyP<sup>5+</sup>; D: Representative traces of atria contractility, before and after caffeine stimulation, in the presence (bottom) or absence (top) of MnTE-2-PyP<sup>5+</sup>; E: Bar graph showing increased contractility after caffeine stimulation in MnTE-2-PyP<sup>5+</sup> incubated atria. n= at least 5 hearts per group. \* p ≤ 0.05.
