# Supplementary material for: Redox-Active Drug, MnTE-2-PyP5+, Prevents and Treats Cardiac Arrhythmias Preserving Heart Contractile Function
Source: Oxid Med Cell Longev. 2020 Mar 21;2020:4850697. doi: 10.1155/2020/4850697 (PMC7115175; doi:10.1155/2020/4850697)
Supplement: Supplementary 2 — Supplementary figure 1: (E) the bar graph of contraction force average for each group. Measurements were made on the last contraction before the pause and on the first contraction after the rest interval. Supplementary videos 1-4: representative videos of Fluo-4 AM (10 μM; Invitrogen, Eugene, OR)-loaded cardiomyocytes, under field stimulation (1 Hz), recorded in a Zeiss Axio Observer A1 fluorescent microscope. [file 4850697.f2.zip]

Archive with 4 entries (4 files):
- Supplementary video 1_OMCL_2991324.mp4
- Supplementary video 2_OMCL_2991325.mp4
- Supplementary video 3_OMCL_2991326.mp4
- Supplementary video 4_OMCL_2991327.mp4
